# Supplementary material
Source: PubMed Central journal article supplement (PMC5984657)
Supplement: NIHMS921061-supplement-supplement_1.pdf [file NIHMS921061-supplement-supplement_1.pdf]

**ONLINE DATA SUPPLEMENT**

**Rituximab in the treatment of interstitial lung disease associated with antisynthetase  
syndrome: a multi-center retrospective case review**

Tracy J. Doyle, Namrata Dhillon, Rachna Madan, Fernanda Cabral, Elaine A. Fletcher, Diane C.  
Koontz, Rohit Aggarwal, Juan C. Osorio, Ivan O. Rosas, Chester V. Oddis, and Paul F. Dellaripa

**Corresponding author:**

Paul F. Dellaripa, M.D.

Division of Rheumatology, Immunology and Allergy / Department of Medicine

Brigham and Women's Hospital / Harvard Medical School

75 Francis Street

Boston, MA 02115

Email: [pdellaripa@partners.org](mailto:pdellaripa@partners.org)

Table S1: Scoring of HRCT Findings

|                                                                                                 |
|-------------------------------------------------------------------------------------------------|
| <b>Overall HRCT score (%) = average score of normal attenuation x 1</b>                         |
| <b>+ Average score of GGA without traction bronchiectasis or bronchiolectasis x 2</b>           |
| <b>+ Average score of consolidation without traction bronchiectasis or bronchiolectasis x 3</b> |
| <b>+ Average score of GGA with traction bronchiectasis or bronchiolectasis x 4</b>              |
| <b>+ Average score of consolidation with traction bronchiectasis or bronchiolectasis x 5</b>    |
| <b>+ Average score of honeycombing x 6</b>                                                      |

Adapted from Fujimoto K, Eur Radiol 2012; 22:83-92 [REF 40] and Ichikado K, Am J Respir Crit Care Med 2002; 165:1551-1556 [REF 41].

Table S2: Comparison of individual pre and post RTX CT score, PFT measurements, and prednisone dose at 1 and 3 years of follow-up in 13 BWH and 12 UPMC subjects included in this study.

| BWH                        | CT Score |       |       | FVC%     |     |      | TLC%     |     |      | DLCO%    |     |      | Prednisone Dose (mg) |     |      |
|----------------------------|----------|-------|-------|----------|-----|------|----------|-----|------|----------|-----|------|----------------------|-----|------|
|                            | Baseline | 1Yr   | 3Yrs  | Baseline | 1Yr | 3Yrs | Baseline | 1Yr | 3Yrs | Baseline | 1Yr | 3Yrs | Baseline             | 1Yr | 3Yrs |
| Subject 1                  | 117.5    | 120** | .     | 95       | .   | 110* | .        | .   | 78   | 87       | .   | 99   | 5                    | .   | .    |
| Subject 2                  | 125.1    | .     | 113.7 | 65       | 83  | 86   | 62       | 75  | 88   | 40       | 55  | 64   | 20                   | 20  | 4    |
| Subject 3                  | 212.4    | 217   | .     | 41       | 42  | .    | .        | 50  | .    | 40       | 21  | .    | 30                   | 2.5 | .    |
| Subject 4                  | 237.4    | .     | .     | 63       | 65  | .    | 53       | 58  | .    | 36       | 36  | .    | 40                   | .   | .    |
| Subject 5                  | 195.8    | .     | .     | 50       | 56  | 77   | 40       | 49  | 61   | 39       | 37  | .    | 15                   | 5   | 2.5  |
| Subject 6                  | 223.2    | 186.6 | .     | 44       | 42  | .    | 43       | .   | .    | 39       | 28  | .    | 20                   | 40  | .    |
| Subject 7                  | 181.6    | 172.5 | .     | 47       | 79  | 96   | .        | 62  | 72   | .        | 42  | 53   | 20                   | 7   | 3    |
| Subject 8                  | 256.5    | .     | 235.4 | 45       | .   | 54   | .        | .   | 46   | .        | .   | 32   | 20                   | .   | .    |
| Subject 9                  | 206.5    | .     | .     | 51       | 75  | .    | 46       | 62  | .    | 35       | 39  | .    | 20                   | 0   | .    |
| Subject 10                 | 139.2    | .     | .     | 58       | 63  | .    | 74       | 78  | .    | 50       | 57  | .    | 5                    | 5   | .    |
| Subject 11                 | 158.7    | .     | .     | 48       | 54  | .    | 45       | 49  | .    | 27       | 31  | .    | 15                   | 9   | .    |
| Subject 12                 | 206.5    | 130.8 | .     | 89       | 100 | .    | .        | 94  | .    | 66       | 76  | .    | 30                   | 15  | .    |
| Subject 13                 | 141.3    | .     | 166.3 | .        | .   | .    | .        | .   | .    | .        | .   | .    | .                    | .   | .    |
| UPMC                       | CT Score |       |       | FVC%     |     |      | TLC%     |     |      | DLCO%    |     |      | Prednisone Dose (mg) |     |      |
|                            | Baseline | 1Yr   | 3Yrs  | Baseline | 1Yr | 3Yrs | Baseline | 1Yr | 3Yrs | Baseline | 1Yr | 3Yrs | Baseline             | 1Yr | 3Yrs |
| Subject 1                  | .        | .     | .     | 59       | 60  | .    | .        | .   | .    | 29       | 26  | .    | 6                    | 5   | .    |
| Subject 2                  | 257.9    | 278.8 | .     | 39       | 33  | .    | .        | 42  | .    | 42       | 18  | .    | 30                   | 10  | .    |
| Subject 3                  | 271.6    | .     | .     | 52       | 43  | .    | .        | .   | .    | 18       | 10  | .    | 21                   | 20  | .    |
| Subject 4 <sup>&amp;</sup> | 128.7    | .     | .     | 40       | .   | 46   | .        | .   | 56   | 55       | .   | 52   | 30                   | .   | 15   |
| Subject 5                  | 137.1    | .     | .     | 72       | 70  | .    | .        | .   | .    | 30       | 30  | .    | 15                   | 15  | .    |
| Subject 6 <sup>&amp;</sup> | 119.6    | 201.6 | .     | 85       | .   | .    | 87       | .   | .    | 51       | .   | .    | 75                   | .   | .    |
| Subject 7                  | 255.4    | 250.8 | .     | 72       | 62  | .    | .        | 58  | .    | 68       | 38  | .    | 20                   | 5   | .    |
| Subject 8                  | 275.3    | .     | 127.1 | 46       | 58  | 67   | .        | .   | .    | 38       | 50  | 64   | 30                   | 40  | .    |
| Subject 9                  | .        | .     | .     | 76       | 34  | .    | 70       | 77  | .    | 48       | 34  | .    | 0                    | 0   | .    |
| Subject 10                 | 110.4    | .     | .     | 63       | .   | .    | .        | .   | .    | 26       | .   | .    | 20                   | .   | .    |

|                   |   |   |   |    |    |   |    |   |   |    |    |   |      |   |   |
|-------------------|---|---|---|----|----|---|----|---|---|----|----|---|------|---|---|
| <b>Subject 11</b> | . | . | . | 68 | 91 | . | 80 | . | . | 29 | .  | . | 40   | . | . |
| <b>Subject 12</b> | . | . | . | 32 | 33 | . | 42 | . | . | 27 | 29 | . | 12.5 | 5 | . |

\*Cells highlighted in green demonstrate improvement defined as  $\geq 10\%$  decrease in CT score,  $\geq 10\%$  increase in FVC%, TLC%, or DLCO% or a decrease in prednisone dose when compared to baseline values. \*\*Cells highlighted in blue demonstrate stability defined as a  $\leq 10\%$  increase in CT score,  $\leq 10\%$  decrease in FVC%, TLC%, or DLCO% or no change in prednisone dose when compared to baseline values.

&UPMC Subject 4 died from respiratory failure secondary to progression of underlying ILD 2 years after receiving RTX; UPMC Subject 6 died from anoxic brain injury 10 years after receiving RTX.

Abbreviations: RTX – Rituximab, CT – Computed tomography, PFTs - Pulmonary function tests, BWH - Brigham and Women’s Hospital, UPMC – University of Pittsburgh Medical Center, FVC% - Forced vital capacity (% predicted), TLC% - Total lung capacity (% predicted), DLCO% - Diffusion capacity of carbon monoxide (% predicted), Yr – Year

Table S3: Subgroup analyses for individuals with both baseline and 1 year follow up CT scans or PFTs comparing averages at baseline and 1 year with the average individual change (p-value)

|                                                     | CT scan score<br>n=8 |                         | FVC%<br>n=19         |                         | TLC%<br>n=7          |                         | DLCO%<br>n=17        |                         |
|-----------------------------------------------------|----------------------|-------------------------|----------------------|-------------------------|----------------------|-------------------------|----------------------|-------------------------|
|                                                     | Pre vs. 1 yr<br>post | Ave Ind Δ<br>(p-value)* | Pre vs. 1<br>yr post | Ave Ind Δ<br>(p-value)* | Pre vs. 1<br>yr post | Ave Ind Δ<br>(p-value)* | Pre vs. 1<br>yr post | Ave Ind Δ<br>(p-value)* |
| <b>All subjects<br/>n=25</b>                        | 197 vs. 195          | -2.0<br>(0.84)          | 56 vs. 60            | +3.7<br>(0.18)          | 56 vs. 64            | +8.3<br>(0.016)         | 40 vs. 36            | -3.4<br>(0.46)          |
| <b>Jo1<br/>n=16</b>                                 | 191 vs. 196          | +5.0<br>(0.81)          | 64 vs. 65            | +1.2<br>(0.70)          | 63 vs. 73            | +10<br>(0.13)           | 43 vs. 38            | -4.3<br>(0.57)          |
| <b>PL12<br/>n=6</b>                                 | 197 vs. 195          | -2.3<br>(1.0)           | 43 vs. 53            | +10.4<br>(0.063)        | N/A                  | N/A                     | 33 vs. 33            | -0.25<br>(0.88)         |
| <b>PL7<br/>n=3</b>                                  | N/A                  | N/A                     | 52 vs. 54            | +2<br>(0.75)            | 47 vs. 54            | +7<br>(0.50)            | 38 vs. 34            | -4.3<br>(0.50)          |
| <b>NSIP<br/>n=9</b>                                 | 184 vs. 175          | -10<br>(1.0)            | 54 vs. 61            | +7<br>(0.07)            | 53 vs. 63            | +9.2<br>(0.063)         | 38 vs. 37            | -0.25<br>(0.89)         |
| <b>NSIP/COP<br/>n=4</b>                             | 150 vs. 187          | +36<br>(1.0)            | 55 vs. 72            | +17<br>(0.50)           | N/A                  | N/A                     | N/A                  | N/A                     |
| <b>Fibrotic ILD<br/>n=4</b>                         | 232 vs. 205          | -27<br>(1.0)            | 60 vs. 59            | -1.3<br>(1.0)           | N/A                  | N/A                     | 42 vs. 35            | -7.3<br>(0.75)          |
| <b>CT score &gt; 194 /<br/>n=11</b>                 | N/A                  | N/A                     | 55 vs. 58            | +2.9<br>(0.47)          | 46 vs. 56            | +10<br>(0.25)           | 42 vs. 35            | -6.8<br>(0.25)          |
| <b>CT score ≤ 194 /<br/>n=10</b>                    | N/A                  | N/A                     | 58 vs. 63            | +4.7<br>(0.24)          | 63 vs. 70            | +7<br>(0.13)            | 36 vs. 37            | +1.6<br>(0.56)          |
| <b>FVC &lt; 50<br/>n=9</b>                          | 2.19 vs.<br>214      | -5<br>(0.88)            | N/A                  | N/A                     | N/A                  | N/A                     | 36 vs. 30            | -6<br>(0.56)            |
| <b>FVC ≥ 50<br/>n=15</b>                            | 174 vs. 176          | +1.1<br>(1.0)           | N/A                  | N/A                     | 58 vs. 67            | +9<br>(0.031)           | 42 vs. 40            | -2<br>(0.91)            |
| <b>TLC% &lt; 50<br/>n=5</b>                         | 208 vs. 194          | -14<br>(0.38)           | 53 vs. 58            | +4.6<br>(0.29)          | N/A                  | N/A                     | 38 vs. 33            | -5<br>(0.35)            |
| <b>TLC% ≥ 50<br/>n=4</b>                            | N/A                  | N/A                     | 66 vs. 67            | +1.2<br>(0.63)          | N/A                  | N/A                     | 44 vs. 46            | +2<br>(0.75)            |
| <b>DLCO% &lt;35<br/>n=7</b>                         | N/A                  | N/A                     | 54 vs. 61            | +7.4<br>(0.34)          | N/A                  | N/A                     | N/A                  | N/A                     |
| <b>DLCO% ≥35<br/>n=15</b>                           | 199 vs. 198          | -1.0<br>(1.0)           | 58 vs 59             | +1.6<br>(0.37)          | 58 vs 67             | +9<br>(0.031)           | N/A                  | N/A                     |
| <b>RTX as rescue tx<br/>n=21</b>                    | 198 vs. 209          | +11.5<br>(0.69)         | 56 vs. 56            | +0.27<br>(0.67)         | 58 v. 64             | +8.3<br>(0.016)         | 39 vs. 34            | -4.6<br>(0.29)          |
| <b>RTX as initial tx<br/>n=4</b>                    | 194 vs. 152          | --42<br>(0.50)          | 59 vs. 76            | +16.8<br>(0.13)         | N/A                  | N/A                     | 47 vs. 53            | +6<br>(0.50)            |
| <b>No Concurrent<br/>Immumosuppression<br/>n=12</b> | 226 vs. 221          | -5<br>(0.63)            | 48 vs. 54            | +8<br>(0.32)            | 60 vs. 70            | +10<br>(0.34)           | 43 vs. 33            | -10<br>(0.12)           |
| <b>Concurrent<br/>Immumosuppression<br/>n=9</b>     | 119 vs. 161          | +42<br>(0.48)           | 57 vs. 57            | -0.8<br>(0.92)          | 54 vs. 62            | +8<br>(0.009)           | 34 vs. 35            | +0.5<br>(0.89)          |

\* P-value < 0.05 as calculated by Wilcoxon signed rank sum test.

N values are number of total cohort (n=25) that belong in that subgroup. N/A denotes cells with only 1 value.

Abbreviations: CT – Computed tomography, PFTs - Pulmonary function tests, NSIP – Non-specific interstitial pneumonia, COP – Cryptogenic organizing pneumonia, ILD – Interstitial lung disease, FVC% - Forced vital capacity (% predicted), TLC% - Total lung capacity (% predicted), DLCO% - Diffusion capacity of carbon monoxide (% predicted), RTX – Rituximab
